# Supplementary material
Source: Springer Nature journal article supplement (https://www.springermedizin.de/resource/supplementary/12939_2012_294_MOESM2_ESM.pdf/9550772)
Supplement: MOESM2 [file 9550772]

**Additional File 2: ON Healthy eating and active living initiatives analyzed (60)**

|                             | <b>Lifestyle-based (36)</b>                                                                                                                                                                                                                                                                                                                                                                                                                                                                                                                                                                                                                                                                                                                                                                                                                                                     | <b>Environment-based (26)</b>                                                                                                                                                                                                                                                                                                                                                                                                                                                                                                                                                                                                 | <b>Structure-based (9)</b>                                                                                                                                                                                                                                     |
|-----------------------------|---------------------------------------------------------------------------------------------------------------------------------------------------------------------------------------------------------------------------------------------------------------------------------------------------------------------------------------------------------------------------------------------------------------------------------------------------------------------------------------------------------------------------------------------------------------------------------------------------------------------------------------------------------------------------------------------------------------------------------------------------------------------------------------------------------------------------------------------------------------------------------|-------------------------------------------------------------------------------------------------------------------------------------------------------------------------------------------------------------------------------------------------------------------------------------------------------------------------------------------------------------------------------------------------------------------------------------------------------------------------------------------------------------------------------------------------------------------------------------------------------------------------------|----------------------------------------------------------------------------------------------------------------------------------------------------------------------------------------------------------------------------------------------------------------|
| <b>Direct (38)</b>          | <ol style="list-style-type: none"> <li>1. Eat Right Ontario</li> <li>2. Healthy Babies, Healthy Children</li> <li>3. Have a Ball</li> <li>4. Community Food Advisor Program</li> <li>5. Colour It Up</li> <li>6. Fuel Up for Fun</li> <li>7. Busy Bodies</li> <li>8. Eat Right Be Active</li> <li>9. Nutristep</li> <li>10. Healthy Measures*</li> <li>11. PlaySport</li> <li>12. Ontario's After-school Program</li> <li>13. Active2010 website</li> <li>14. Healthy Ontario website</li> <li>15. Physical Activity and Sport for Women Aged 55 to 70+ Program</li> <li>16. Vegetable and Fruit Radio Ads</li> <li>17. Prends-toi en Main!</li> <li>18. Project ACT/Projet ACTIF</li> <li>19. Daily Physical Activity</li> <li>20. Everyone Jump</li> <li>21. Back to Nature</li> <li>22. Heart and Stroke Foundation of Ontario website</li> <li>23. Walk This Way</li> </ol> | <ol style="list-style-type: none"> <li>1. Bill 8: Healthy Foods, Healthy Schools</li> <li>2. Healthy Schools Recognition Program</li> <li>3. Eat Smart</li> <li>4. Healthy Food Guidelines for the Great Waterfront Trail Adventure</li> <li>5. Marketing to Children Workgroup</li> <li>6. Mars Landing</li> <li>7. Ontario Trails Strategy</li> <li>8. Trails Open Ontario</li> <li>9. Future of the Good Food Box Program</li> <li>10. Healthy Communities and the Built Environment</li> <li>11. Daily Physical Activity</li> <li>12. Back to Nature</li> <li>13. Youth Friendly Community Recognition Program</li> </ol> | <ol style="list-style-type: none"> <li>1. OCDPA Advocacy Work (ex. common messages)</li> <li>2. Nutritious Food Basket</li> </ol>                                                                                                                              |
| <b>Blueprint (23)</b>       | <ol style="list-style-type: none"> <li>1. Ontario Heart Health Program Policy Framework*</li> <li>2. Minding our Bodies*</li> <li>3. Let's be Healthy Together*</li> <li>4. Healthy Measures*</li> <li>5. Living Schools</li> <li>6. Health and Physical Activity Support Documents</li> <li>7. Obesity Messages: Making them Stick</li> <li>8. OPHEA Early Learning Resource</li> <li>9. Vibrant Faces</li> <li>10. Ontario Agri-Food Education (OAFE) Teaching Resources</li> <li>11. Teach Nutrition Programs and Resources</li> </ol>                                                                                                                                                                                                                                                                                                                                       | <ol style="list-style-type: none"> <li>1. Ontario Heart Health Program Policy Framework*</li> <li>2. Minding our Bodies*</li> <li>3. Online Activity Planner</li> <li>4. Health and Physical Activity Curriculum Support Documents</li> <li>5. Comprehensive Workplace Health Promotion (CWHP) Project</li> <li>6. Ontario Student Nutrition Program</li> <li>7. Project ACT/Projet ACTIF</li> <li>8. OPHEA Daily Physical Activity Supports</li> <li>9. Inclusion Resources (OPHEA)</li> </ol>                                                                                                                               | <ol style="list-style-type: none"> <li>1. Healthy Communities: An Approach to Action on Health Determinants in Canada</li> <li>2. Creating Inclusive Community Organizations</li> <li>3. Let's be Healthy Together (toolkit for service providers)*</li> </ol> |
| <b>Building Blocks (12)</b> | <ol style="list-style-type: none"> <li>1. Spark Together for Healthy Kids*</li> <li>2. Healthy Communities Fund*</li> <li>3. HC Link*</li> <li>4. Physical Activity Resource Centre</li> </ol>                                                                                                                                                                                                                                                                                                                                                                                                                                                                                                                                                                                                                                                                                  | <ol style="list-style-type: none"> <li>1. Spark Together for Healthy Kids*</li> <li>2. The Children's Collaborative</li> <li>3. Healthy Communities Fund*</li> <li>4. HC Link*</li> </ol>                                                                                                                                                                                                                                                                                                                                                                                                                                     | <ol style="list-style-type: none"> <li>1. Spark Together for Healthy Kids*</li> <li>2. Health Promotion Hub</li> <li>3. FoodNet Ontario Database</li> <li>4. HC Link*</li> </ol>                                                                               |

\*Initiatives have components that fit into multiple categories such as lifestyle-based and environment-based, or blueprint and building blocks.
